# Supplementary material for: Application of Immobilized Biocatalysts in the Biotransformation of Non-Steroidal Anti-Inflammatory Drugs
Source: MDPI journal article supplement (doi:10.3390/app13137789), 2023-07-01
Supplement: s1 [file s1]

Supplementary Materials

# **Application of Immobilized Biocatalysts in the Biotransformation of Non-Steroidal Anti-Inflammatory Drugs**

Agnieszka Nowak, Anna Dzionek, Danuta Wojcieszynska and Urszula Guzik \*

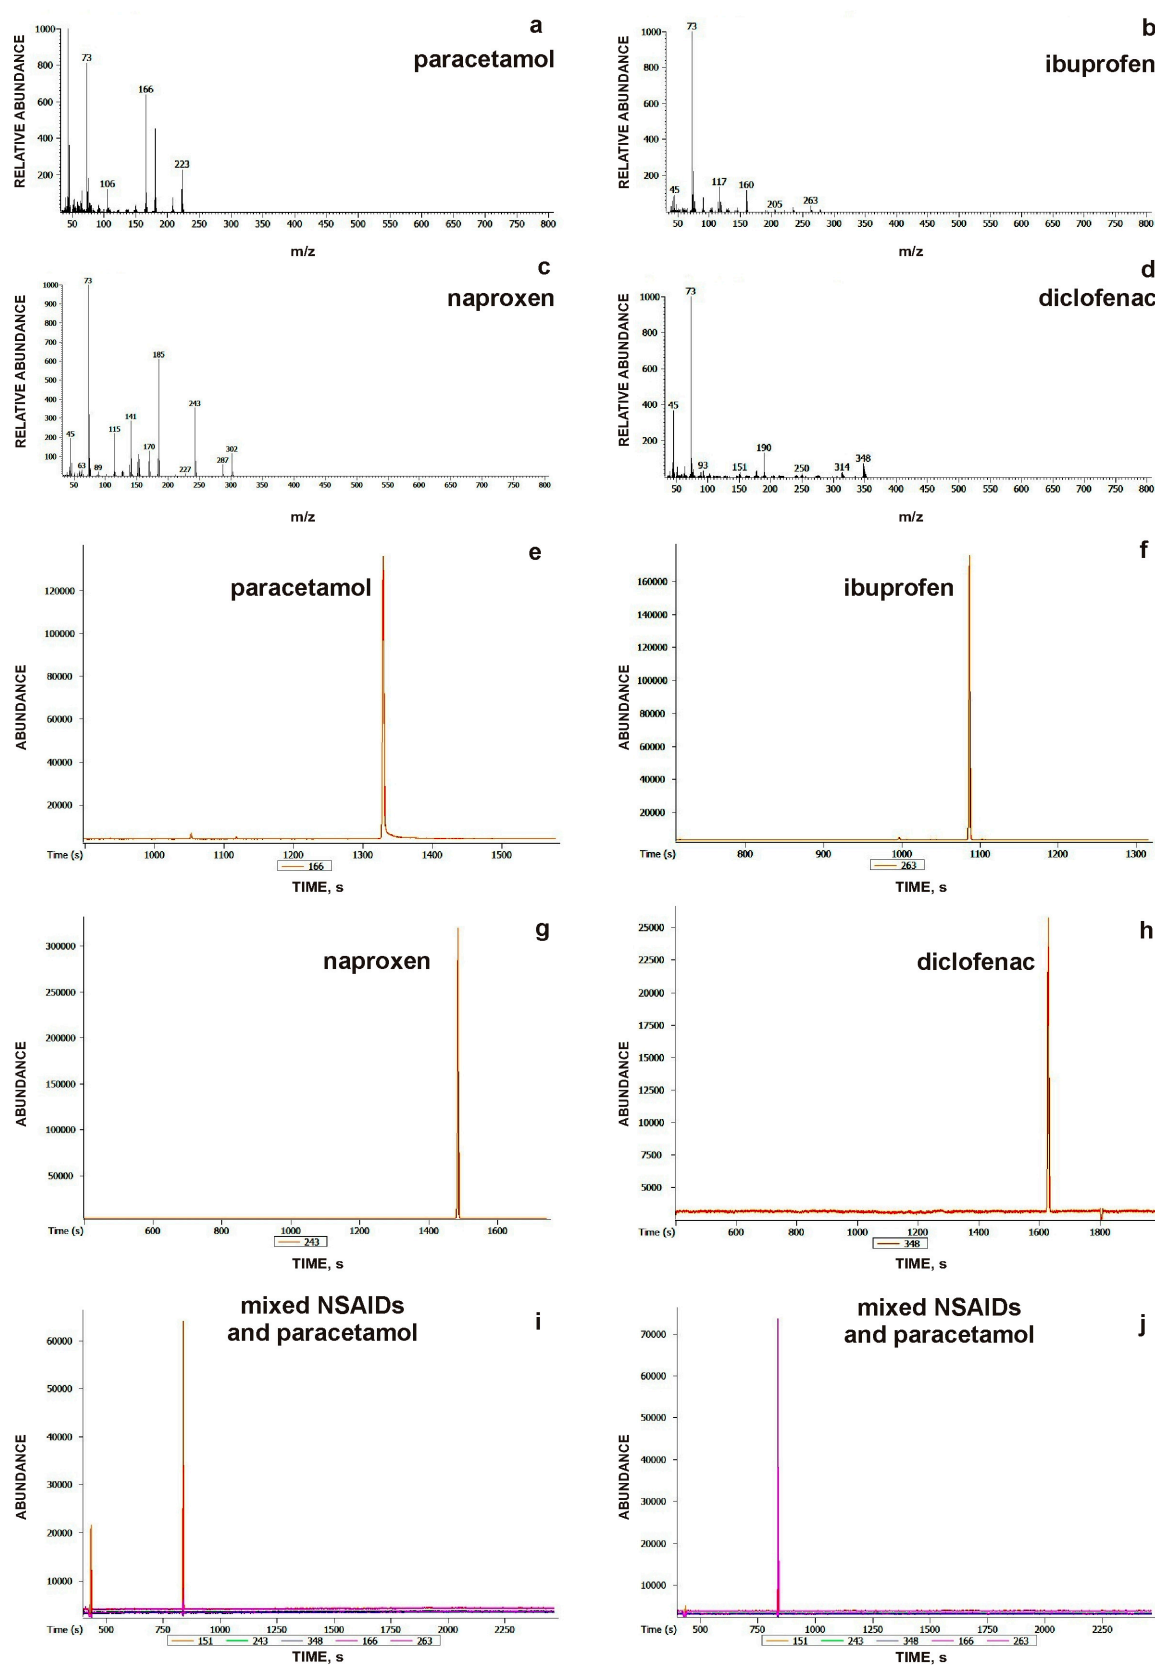

Figure S1. MS spectra of paracetamol (a), ibuprofen (b), naproxen (c), diclofenac (d), their chromatograms (e-h) and chromatograms of mixed NSAIDs and paracetamol after 14 (i) and 16 days (j).

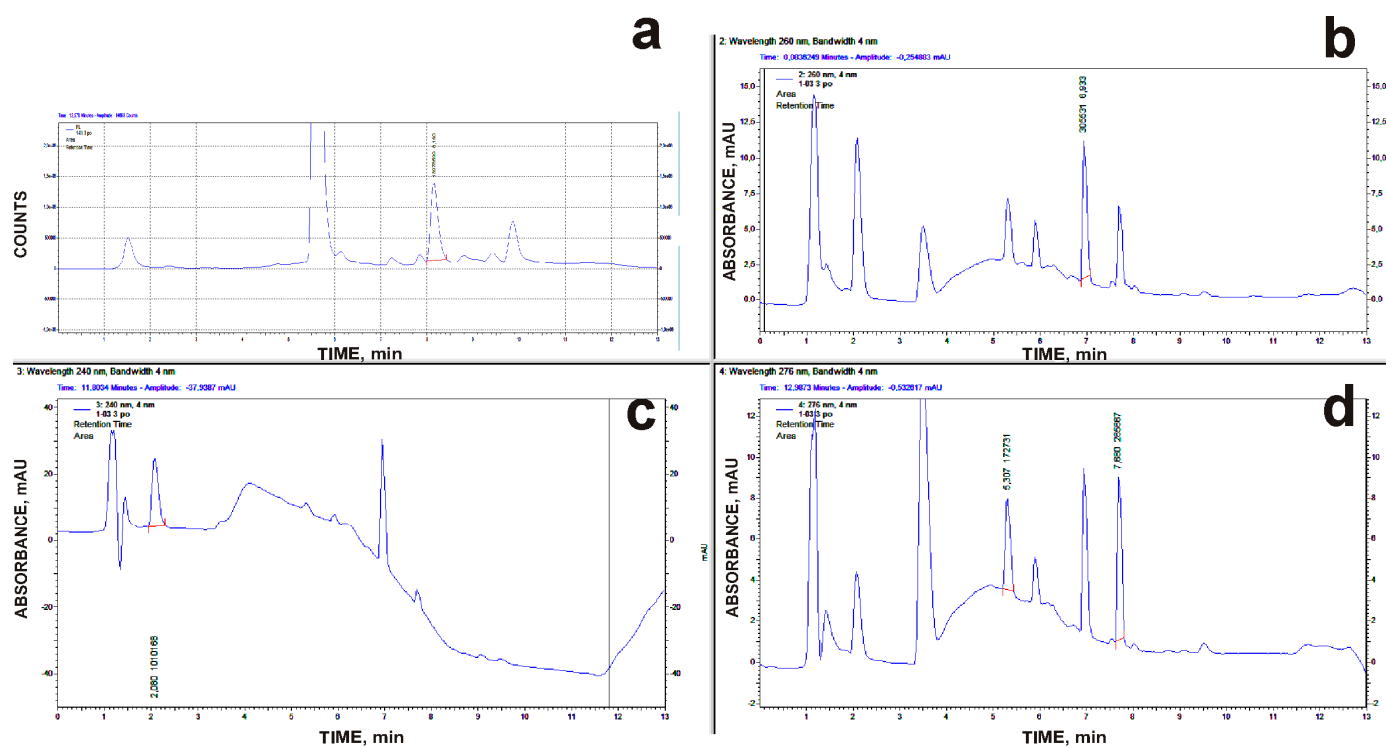

Figure S2. HPLC chromatograms of ibuprofen (a), naproxen (b), paracetamol (c), and diclofenac (d) after 7 days of degradation with the biopreparation.
